# Supplementary material
Source: PubMed Central journal article supplement (PMC3949440)
Supplement: Supp_Fig1.pdf [file Supp_Fig1.pdf]

## Supplementary Data

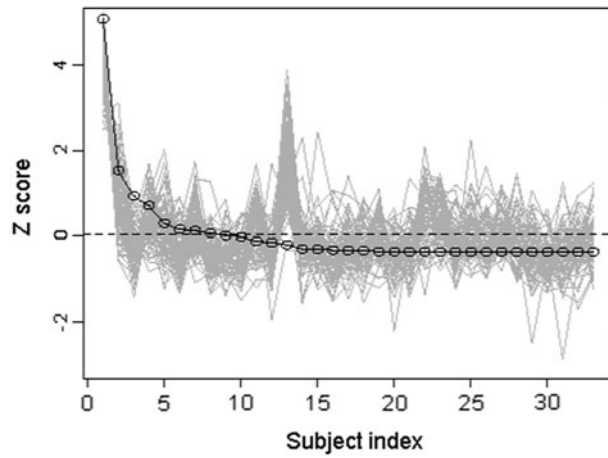

**SUPPLEMENTARY FIG. S1.** Correlation of serum IL-4 concentration with gene expression in cluster c10. Subject listing of serum levels of IL-4 (*circles*) ordered by concentration (log<sub>10</sub> pg/mL) versus Z score of expression levels for genes in cluster c10 (*gray lines*). Z scores are calculated for each gene using the formula:  $(x - \text{mean}) / \text{standard deviation}$ , where x is the expression/serum levels for a gene/cytokine and mean and standard deviation is calculated for that gene/cytokine across all subjects.
