# Supplementary material
Source: PubMed Central journal article supplement (PMC3949440)
Supplement: Supp_Table2.pdf [file Supp_Table2.pdf]

SUPPLEMENTARY TABLE S2. GENES DIFFERENTIALLY EXPRESSED IN PBMCs FROM SEVERE OR ASYMPTOMATIC WNV SUBJECTS

| Genes up-regulated in severe subjects |                     |          | Genes up-regulated in asymptomatic subjects |                     |          |
|---------------------------------------|---------------------|----------|---------------------------------------------|---------------------|----------|
| Gene                                  | Log 2 (Fold Change) | P Value  | Gene                                        | Log 2 (Fold Change) | P Value  |
| PI3                                   | 1.46                | 1.44E-04 | MS4A6A                                      | 1.53                | 3.00E-04 |
| IL8                                   | 1.13                | 4.27E-04 | ANG                                         | 0.98                | 6.15E-05 |
| TNFAIP6                               | 1.12                | 1.03E-03 | CHST13                                      | 0.93                | 1.98E-03 |
| CCL4L1                                | 1.02                | 1.20E-03 | RNASE6                                      | 0.86                | 1.71E-03 |
| SLC25A24                              | 1.01                | 6.71E-04 | LY86                                        | 0.85                | 3.62E-04 |
| GPR68                                 | 0.78                | 8.52E-05 | ASGR1                                       | 0.82                | 1.37E-03 |
| KRT86                                 | 0.69                | 4.46E-04 | RGS18                                       | 0.82                | 2.03E-03 |
| TNF                                   | 0.62                | 2.36E-04 | CYBRD1                                      | 0.76                | 6.36E-04 |
| CYP1B1                                | 0.61                | 2.17E-03 | PECAM1                                      | 0.69                | 6.82E-04 |
| SLC7A11                               | 0.61                | 3.31E-04 | RNASE4                                      | 0.66                | 1.42E-04 |
| SRXN1                                 | 0.60                | 7.00E-04 | MIR1978                                     | 0.60                | 1.95E-03 |
| CD160                                 | 0.59                | 9.58E-04 | AVP11                                       | 0.58                | 2.19E-03 |
| SPRY2                                 | 0.57                | 2.63E-04 | CAT                                         | 0.57                | 1.29E-05 |
| TMEM158                               | 0.53                | 3.68E-04 | GPR34                                       | 0.56                | 1.94E-03 |
| NFKBIZ                                | 0.52                | 5.20E-04 | SLC2A8                                      | 0.54                | 1.38E-03 |
| CYP4B1                                | 0.52                | 1.30E-03 | RAB32                                       | 0.53                | 1.85E-03 |
| MIR302C                               | 0.50                | 1.88E-03 | DNASE2                                      | 0.51                | 2.22E-03 |
| MAFF                                  | 0.49                | 1.07E-03 | NAPRT1                                      | 0.51                | 1.15E-03 |
| TNFAIP3                               | 0.45                | 1.08E-04 | C10orf11                                    | 0.47                | 7.43E-04 |
| CD69                                  | 0.45                | 2.34E-04 | ABCC5                                       | 0.46                | 1.22E-03 |
| TNIP1                                 | 0.45                | 1.42E-03 | SLC27A1                                     | 0.46                | 1.27E-03 |
| TSC22D1                               | 0.44                | 1.26E-04 | PYCARD                                      | 0.45                | 5.85E-04 |
| PIM1                                  | 0.44                | 1.95E-03 | LOC728519                                   | 0.44                | 1.12E-03 |
| TMEM138                               | 0.43                | 1.13E-03 | SLC16A5                                     | 0.44                | 8.79E-04 |
| MTF1                                  | 0.41                | 2.20E-03 | ZNF185                                      | 0.43                | 1.39E-03 |
| ZC3H12A                               | 0.40                | 8.92E-04 | PTGFRN                                      | 0.43                | 9.72E-04 |
| SGPP2                                 | 0.40                | 8.63E-04 | ADAM15                                      | 0.42                | 6.23E-04 |
| ASAP1                                 | 0.38                | 5.97E-04 | AP1B1                                       | 0.41                | 7.25E-04 |
| CDC42SE2                              | 0.36                | 3.06E-04 | DPEP2                                       | 0.41                | 2.79E-04 |
| KIAA1618                              | 0.34                | 1.53E-03 | SYK                                         | 0.41                | 1.32E-03 |
| VASP                                  | 0.33                | 6.77E-04 | GALK1                                       | 0.40                | 4.67E-05 |
| INSIG1                                | 0.33                | 4.02E-04 | IDH2                                        | 0.39                | 7.23E-04 |
| IL21R                                 | 0.32                | 3.56E-04 | FAM13A                                      | 0.38                | 3.29E-04 |
| ACSL5                                 | 0.31                | 6.37E-04 | HS3ST2                                      | 0.37                | 2.21E-03 |
| SC4MOL                                | 0.31                | 8.77E-05 | CNRIP1                                      | 0.36                | 6.18E-04 |
| CMAS                                  | 0.30                | 8.40E-04 | TM6SF1                                      | 0.36                | 1.55E-03 |
| KLF9                                  | 0.29                | 3.68E-05 | HEXB                                        | 0.34                | 1.78E-03 |
| NFKB2                                 | 0.29                | 1.21E-03 | TCEAL4                                      | 0.33                | 1.30E-04 |
| UBE2J1                                | 0.28                | 5.65E-04 | SLC46A3                                     | 0.33                | 2.23E-03 |
| SEMA4D                                | 0.28                | 3.18E-04 | C11orf67                                    | 0.32                | 1.92E-03 |
| TANK                                  | 0.27                | 6.77E-05 | CCDC106                                     | 0.32                | 1.83E-03 |
| NUFIP2                                | 0.27                | 2.04E-05 | LOC653381                                   | 0.32                | 9.33E-05 |
|                                       |                     |          | REPS2                                       | 0.32                | 1.86E-03 |
|                                       |                     |          | KLF11                                       | 0.32                | 9.95E-04 |
|                                       |                     |          | BMF                                         | 0.32                | 5.63E-04 |
|                                       |                     |          | ATG4C                                       | 0.31                | 1.51E-04 |
|                                       |                     |          | HOMER3                                      | 0.31                | 7.63E-04 |
|                                       |                     |          | CRTAP                                       | 0.30                | 7.37E-04 |
|                                       |                     |          | PBX3                                        | 0.30                | 1.61E-03 |
|                                       |                     |          | BRI3BP                                      | 0.30                | 9.87E-05 |
|                                       |                     |          | MRPL23                                      | 0.30                | 1.76E-03 |
|                                       |                     |          | LRP1                                        | 0.29                | 1.22E-03 |
|                                       |                     |          | MRPL43                                      | 0.29                | 4.49E-04 |
|                                       |                     |          | GSTP1                                       | 0.29                | 8.30E-04 |
|                                       |                     |          | GTF2H5                                      | 0.29                | 2.05E-04 |
|                                       |                     |          | EEF2K                                       | 0.29                | 1.03E-03 |
|                                       |                     |          | TMEM77                                      | 0.28                | 3.97E-04 |
|                                       |                     |          | TEX2                                        | 0.28                | 6.91E-04 |
|                                       |                     |          | DHRS4                                       | 0.28                | 5.77E-04 |
|                                       |                     |          | TRIM25                                      | 0.27                | 7.22E-04 |
|                                       |                     |          | TMEM14C                                     | 0.27                | 3.41E-04 |
|                                       |                     |          | DERA                                        | 0.27                | 1.72E-03 |
|                                       |                     |          | SLC37A4                                     | 0.26                | 2.12E-03 |

FDR < 0.25 and absolute (log<sub>2</sub> (fold change)) ≤ 0.26.
